# Supplementary material for: Obesity and eating disorders in integrative prevention programmes for adolescents: protocol for a systematic review and meta-analysis
Source: PubMed Central journal article supplement (PMC5914714; doi:10.1136/bmjopen-2017-020381), 2018-04-19
Supplement: bmjopen-2017-020381.draft_revisions.pdf [file bmjopen-2017-020381.draft_revisions.pdf]

# BMJ Open

BMJ Open is committed to open peer review. As part of this commitment we make the peer review history of every article we publish publicly available.

When an article is published we post the peer reviewers' comments and the authors' responses online. We also post the versions of the paper that were used during peer review. These are the versions that the peer review comments apply to.

The versions of the paper that follow are the versions that were submitted during the peer review process. They are not the versions of record or the final published versions. They should not be cited or distributed as the published version of this manuscript.

BMJ Open is an open access journal and the full, final, typeset and author-corrected version of record of the manuscript is available on our site with no access controls, subscription charges or pay-per-view fees (<http://bmjopen.bmj.com>).

If you have any questions on BMJ Open's open peer review process please email [info.bmjopen@bmj.com](mailto:info.bmjopen@bmj.com)

# BMJ Open

## Obesity and eating disorders in integrative prevention programs for adolescents: protocol for a systematic review and meta-analysis

|                               |                                                                                                                                                                                                                                                                                                                                                                                                                                                                                                                                                                                                                                                                                                                                                                 |
|-------------------------------|-----------------------------------------------------------------------------------------------------------------------------------------------------------------------------------------------------------------------------------------------------------------------------------------------------------------------------------------------------------------------------------------------------------------------------------------------------------------------------------------------------------------------------------------------------------------------------------------------------------------------------------------------------------------------------------------------------------------------------------------------------------------|
| Journal:                      | <i>BMJ Open</i>                                                                                                                                                                                                                                                                                                                                                                                                                                                                                                                                                                                                                                                                                                                                                 |
| Manuscript ID                 | bmjopen-2017-020381                                                                                                                                                                                                                                                                                                                                                                                                                                                                                                                                                                                                                                                                                                                                             |
| Article Type:                 | Protocol                                                                                                                                                                                                                                                                                                                                                                                                                                                                                                                                                                                                                                                                                                                                                        |
| Date Submitted by the Author: | 03-Nov-2017                                                                                                                                                                                                                                                                                                                                                                                                                                                                                                                                                                                                                                                                                                                                                     |
| Complete List of Authors:     | Barco Leme, Ana Carolina; Universidade de Sao Paulo, Nutrition ; Baylor College of Medicine, Children's Nutrition Research Center<br>Thompson, Debbe ; Baylor College of Medicine, Children's Nutrition Research Center<br>Lenz Dunker, Karin ; Universidade Federal de Sao Paulo Escola Paulista de Medicina, Department of Psychiatric<br>Nicklas, Theresa; Baylor College of Medicine, Children's Nutrition Research Center<br>Tucunduva Philippi, Sonia ; Universidade de Sao Paulo<br>Lopez, Tabbetha ; University of Houston College of Liberal Arts and Social Sciences, Health and Human Performance<br>Vézina-Im, Lydi-Anne; Baylor College of Medicine, Pediatrics-Nutrition<br>Baranowski, Tom; Baylor College of Medicine, Department of Pediatrics |
| Keywords:                     | Adolescent, obesity prevention, Eating disorders < PSYCHIATRY, systematic review, disordered eating                                                                                                                                                                                                                                                                                                                                                                                                                                                                                                                                                                                                                                                             |
|                               |                                                                                                                                                                                                                                                                                                                                                                                                                                                                                                                                                                                                                                                                                                                                                                 |

SCHOLARONE™  
Manuscripts

1  
2  
3 **Obesity and eating disorders in integrative prevention programs for adolescents:**  
4 **protocol for a systematic review and meta-analysis**  
5  
6

7 Ana Carolina Barco Leme<sup>1,2</sup>; Debbe Thompson<sup>2</sup>, Karin Louise Lenz Dunker<sup>3</sup>,  
8 Theresa Nicklas<sup>2</sup>, Sonia Tucunduva Philippi, Tabbetha D. Lopez<sup>4</sup>, Lydi-Anne Vézina-  
9 Im<sup>1</sup>; Tom Baranowski<sup>2</sup>  
10  
11  
12  
13

14 <sup>1</sup> School of Public Health, University of São Paulo, São Paulo, Brazil

15 <sup>2</sup> Children's Nutrition Research Center, Baylor College of Medicine, Houston, Texas

16 <sup>3</sup> Department of Psychiatry, Federal University of São Paulo, São Paulo, Brazil

17 <sup>4</sup> Department of Health and Human Performance, University of Houston, Houston,  
18 Texas  
19  
20  
21  
22

23  
24 E-mails:

25 Ana Carolina Barco Leme [acarol.leme@gmail.com](mailto:acarol.leme@gmail.com)

26 Debbe Thompson [Deborah.Thompson@ARS.USDA.gov](mailto:Deborah.Thompson@ARS.USDA.gov)

27 Karin Lousie Lenz Dunker [kdunker00@yahoo.com](mailto:kdunker00@yahoo.com)

28 Theresa Nicklas [tnicklas@bcm.edu](mailto:tnicklas@bcm.edu)

29 Sonia Tucunduva Philippi [philippi@usp.br](mailto:philippi@usp.br)

30 Tabbetha D. Lopez [tabbethalopez@gmail.com](mailto:tabbethalopez@gmail.com)

31 Lydi-Anne Vézina-Im [Lydi-Anne.Vezina-Im@bcm.edu](mailto:Lydi-Anne.Vezina-Im@bcm.edu)

32 Tom Baranowski [tbaranow@bcm.edu](mailto:tbaranow@bcm.edu)  
33  
34  
35  
36  
37  
38  
39

40 Corresponding author: Ana Carolina Leme

41 Corresponding author address: Children Nutrition Research Center, Baylor College of  
42 Medicine. 1100 Bates Street, Houston, Texas, USA 77003  
43  
44  
45  
46  
47

48 **Abstract for protocol**  
49  
50

51 **Introduction:** Obesity and eating disorders (ED) are public health problems that have  
52 lifelong financial and personal costs, and common risk factors, e.g., body  
53 dissatisfaction, weight teasing and disordered eating (DE). Obesity prevention  
54 interventions might lead to the development of an ED since focusing on weight in  
55  
56  
57  
58  
59  
60

1  
2  
3 addition to being ineffective in weight loss, can contribute to excessive concern with  
4 diet and weight. Therefore, the proposed research will assess whether integrating  
5 obesity and ED prevention procedures do better than single approach interventions in  
6 preventing obesity among adolescents, and if integrated approaches influence weight-  
7 related outcomes. **Methods and analysis:** Integrated obesity and ED prevention  
8 interventions will be identified. Randomized controlled trials reporting data on  
9 adolescents ranging from 10 to 19 years of age from both sexes will be included.  
10 Outcomes of interest include body composition, unhealthy weight control behaviors,  
11 and body satisfaction measurements. MEDLINE/PubMed, PsycINFO, Web of  
12 Science and SciELO will be searched. Data will be extracted independently by two  
13 reviewers using a standardized data extraction form. Trial quality will be assessed  
14 using the Cochrane Collaboration criteria. The effects of integrated vs. single  
15 approach intervention studies will be compared using systematic review procedures.  
16 If an adequate number of studies report data on integrated interventions among  
17 similar populations ( $k > 5$ ), a meta-analysis with random-effects will be conducted.  
18 Sensitivity analyses and meta-regression will be performed only if between-study  
19 heterogeneity is high ( $I^2 \geq 75\%$ ). **Ethics and dissemination:** Ethics approval will not  
20 be required as this is a systematic review of published studies. The findings will be  
21 disseminated through conference presentations and peer-reviewed journals.  
22  
23  
24  
25  
26  
27  
28  
29  
30  
31  
32  
33  
34

### 35 **Strengths and Limitations**

- 36 • Systematic review and meta-analysis of randomized controlled trials
- 37 • According to PRISMA-P statement
- 38 • Registered in PROSPERO (CRD42017076547)
- 39 • Body composition will be objective measures
- 40 • Disordered eating will be assessed through self-reported measurements
- 41
- 42
- 43
- 44
- 45
- 46

47 **Keywords:** Adolescent, obesity prevention, eating disorders, systematic review,  
48 disordered eating  
49

### 50 **Introduction**

51  
52  
53  
54  
55  
56  
57  
58  
59  
60

1  
2  
3 Pediatric overweight and obesity are worldwide public health concerns<sup>1</sup>, with  
4 the highest rates in the USA where 28.8% of boys and 29.7% of girls are overweight  
5 or obese<sup>2</sup>. Western low- and middle-income countries (LMIC) also face unhealthy  
6 child weight, e.g., 24.3% of individuals between 10-19 years of age in Brazil were  
7 overweight or obese<sup>2</sup>. Some evidence indicates a rapid increase in prevalence levels in  
8 LMICs as high or even higher than those found in high-income countries (HICs)<sup>3</sup>.  
9 Obesity has been associated with long and short-term physical health conditions, such  
10 as cardio-metabolic diseases<sup>4</sup>, certain types of cancers<sup>5</sup>, and mental health concerns<sup>6,7</sup>.  
11 Overweight youth are also at risk of becoming obese adults<sup>8</sup>, indicating prevention  
12 should be initiated in youth.  
13  
14  
15  
16  
17  
18

19 Prior systematic reviews have examined childhood obesity prevention studies  
20 <sup>3,9,10</sup>. Findings, however, have been mixed. In one review of school-based  
21 interventions preventing obesity among children and adolescents, an average  
22 difference between the intervention and control groups was  $-0.33\text{kg/m}^2$  ( $-0.55, -0.11$ ,  
23 95%CI), with 84% of this effect explained by the highest quality studies<sup>11</sup>.  
24 Alternatively, another reported a difference of 0.03 (95%CI: 0.09 to 0.03,  $p=0.03$ )  
25 with high heterogeneity ( $I^2=87\%$ )<sup>12</sup>. Thus, evidence regarding the effectiveness of  
26 school-based obesity prevention interventions to reduce BMI in youth is mixed with  
27 high heterogeneity among studies. More narrow age groups who experience common  
28 problems and receive interventions appropriate to these common problems may be  
29 more effective.  
30  
31  
32  
33  
34  
35  
36

37 Eating disorders (ED) are illnesses in which the people experience severe  
38 disturbances in their eating behaviors and related thoughts and emotions. People with  
39 ED typically become pre-occupied with food and their body weight<sup>13</sup>. In DSM-5, the  
40 ED section was renamed “Feeding and Eating Disorders” and specified three ED’s:  
41 anorexia nervosa (AN), bulimia nervosa (BN) and binge eating disorder (BED); and  
42 three feeding disorders: pica, rumination disorder, and avoidant/restrictive food  
43 disorder<sup>13</sup>. These categories, and associated criteria served to decrease the frequency  
44 of the diagnostic category “eating disorder not otherwise specified” (EDNOS), a  
45 heterogeneous not well-defined group of ED. EDNOS was the most common  
46 diagnosis in clinical and community samples of adolescents, accounting for around  
47 80% of all ED diagnoses, with psychopathology and adverse consequences  
48 comparable to AN and BN<sup>13,14</sup>.  
49  
50  
51  
52  
53  
54  
55  
56  
57  
58  
59  
60

1  
2  
3 Due to the increasing prevalence of obesity and ED<sup>15 16</sup> and shared common  
4 risk factors, i.e., body dissatisfaction, unhealthy weight control behaviors/dieting and  
5 weight teasing (Figure 1) there have been calls for integration to address these  
6 common concerns<sup>15</sup>. For instance, obesity and ED can co-occur in the same  
7 individual<sup>15</sup>. A cross-cultural comparison between US and Spanish adolescents found  
8 dieting and use of unhealthy weight control behaviors were higher among overweight  
9 and obese youth and concluded that prevention interventions should address the broad  
10 spectrum of eating and weight-related problems<sup>17</sup>.  
11  
12  
13  
14  
15

16 Disordered eating (DE) behaviors and attitudes are part of the ED continuum  
17 and include obsessively thinking about food and calories, becoming angry when  
18 hungry, being unable to select what to eat, seeking food to compensate for  
19 psychological problems, eating until feeling sick, and presenting unreal myths and  
20 beliefs about eating and weight<sup>18</sup>. DE is not limited to those diagnosed with ED.  
21 Indeed, many individuals experience DE habits, beliefs, and feelings toward food but  
22 are unaware that they are manifesting “abnormal” behaviors<sup>19</sup>.  
23  
24  
25  
26

27 Being overweight during childhood increases the chances of having an ED  
28 during adulthood (compared to normal weight controls)<sup>17</sup>. Some interventions have  
29 addressed both obesity and DE in prevention interventions because of the efficiency  
30 in addressing two conditions with a single intervention and a possible reduced risk of  
31 inadvertently causing ED while trying to prevent obesity<sup>15,20,21</sup>, e.g., strategies to  
32 prevent obesity (monitoring intake and portion control) might unintentionally promote  
33 shape concerns and DE. Integrating obesity and ED prevention programs may prove  
34 easier and more cost-effective than treating them separately, and healthy nutrition and  
35 physical activity are the focus of both ED and obesity prevention programs<sup>22</sup>. Body  
36 dissatisfaction concerns are also addressed in both approaches, but have mismatched  
37 messages. For example, some obesity prevention programs consider it acceptable to  
38 be unhappy about being overweight in order to motivate restricting the amount and  
39 content of food consumed to reduce body weight<sup>22</sup>, while ED prevention programs  
40 promote self-acceptance at any weight, discouraging self-consciousness about dietary  
41 intake. However, data supporting these alternative explanations are scarce<sup>22</sup>.  
42  
43  
44  
45  
46  
47  
48  
49  
50

51 Common obesity and ED risk factors can be categorized into three levels  
52 according to the Social Ecological Model (SEM)<sup>23</sup>: individual (e.g., sex, age and  
53 weight-status), social (e.g., media, weight teasing and ideals beauty pattern) and  
54 psychological (e.g., self-esteem and body satisfaction). Several studies have described  
55  
56  
57  
58  
59  
60

1  
2  
3 the co-presence of these factors, considered risks for the development of an ED and/or  
4 obesity<sup>24-26</sup>. Thus, an integrated approach needs to address the differences in these  
5 prevention philosophies, e.g., eating behaviors (dieting vs. no dieting) and body  
6 weight (lose vs. accept weight)<sup>27</sup>.  
7  
8

9 Few programs aimed at preventing ED assessed the impact on weight status  
10 and other obesity-related outcomes<sup>16,28</sup>. Programs included content of relevance to  
11 obesity prevention (e.g., promotion of healthy weight management). More recent  
12 prevention programs focused on protective factors such as life skills and emotion  
13 regulation competence, with the risk for ED reduced.<sup>27</sup>  
14  
15

16  
17 In summary, obesity and ED have common risk factors with diverse negative  
18 health outcomes, mainly among overweight and female adolescents. Systematic  
19 reviews and meta-analyses have only analyzed results for single approaches (i.e.,  
20 obesity or ED prevention) and the results have been mixed. Interventions that  
21 integrate obesity and ED prevention components might be more effective. A review  
22 of such interventions might provide insight into the mechanisms of effect and inform  
23 interventions that address both problems simultaneously. To the authors' knowledge,  
24 no previous review has identified the impact of integrated obesity and ED prevention  
25 programs for adolescents. The present systematic review will answer the following  
26 questions:  
27  
28

- 29  
30  
31  
32  
33  
34  
35  
36  
37  
38  
39  
40  
41  
42  
43
- Do integrated programs do better than obesity-only prevention programs in improving adolescents' health behavior outcomes and maintaining healthy weight status?
  - Do integrated interventions promote being more satisfied with one's body and reduce unhealthy weight control behaviors in adolescents?

#### 44 **Methods and analysis**

45  
46

47 The study protocol was accepted in PROSPERO  
48 ([www.crd.york.ac.uk/PROSPERO](http://www.crd.york.ac.uk/PROSPERO)) in October 2017 (CRD42017076547). This  
49 protocol follows the Preferred Reporting Items for Systematic Review and Meta-  
50 Analysis Protocol (PRISMA-P) checklist<sup>29</sup>. Modifications to the protocol will be  
51 tracked and dated in PROSPERO.  
52  
53  
54  
55  
56  
57  
58  
59  
60

## Criteria for considering studies for this review

### *Inclusion criteria*

*Population:* adolescents 10 to 19 years of age from both sexes. Adolescents in this age range are at increased risk for unhealthy weight control behaviors and body satisfaction, shared risk factors for obesity and ED. Most published integrated prevention studies are in this age group.

*Type of outcomes:* (1) body composition measurements (i.e., body mass index (BMI), waist circumference or percent body fat); (2) weight control behaviors and/or scales that assess the risk for an ED (such as the Eating Attitudes Test (EAT-26), Sociocultural attitudes towards appearance questionnaire 3 (SATAQ-3) and Eating Disorder Examination Questionnaire (EDE-Q)); (3) self-reported scales on body satisfactions and; (4) other psychological markers (e.g., anxiety, depression and/or self-esteem inventories). Inclusion of at least one of the weight control behaviors and/or scales must have been used to assess the risk for ED<sup>19,27,30,31</sup>.

*Study design:* randomized controlled trials assessing the impact of integrated or obesity- only prevention interventions.

*Type of studies:* Quantitative outcome analyses will be included in the systematic review and meta-analysis.

### **Search strategy**

A structured electronic search will employ all publication years (through July 2017) using four databases: Medical Literature Library of Medicine (MEDLINE) via PubMed ( $\geq 1979$ ), PsycINFO of the American Psychological Association ( $\geq 1954$ ), Web of Science via Clarivate Analytics ( $\geq 1983$ ) and Scientific Electronic Library (SciELO) via BIREME Latin American and Caribbean Center on Health Science Information ( $\geq 1997$ ). Systematic searchers will be developed from this model, applied in MEDLINE: (Obesity) OR Overweight) OR Weight related problems) AND DE) OR ED) OR weight control behaviors) AND adolescents) OR youth) OR teenagers) OR girls) OR boys) AND prevention) OR strategies) OR randomized controlled trial. Congress abstracts, dissertations, theses, and articles published in journals without peer-review will not be included in the review. Only studies written in English, German, Spanish or Portuguese will be included. The results of this search strategy will be reported in a PRISMA flowchart<sup>29</sup>. The bibliographies of papers that match



1  
2  
3 inclusion criteria will be searched by hand to identify further relevant references,  
4 which will be subjected to the same screening and selection process.  
5  
6

#### 7 8 *Screening and data extraction*

9 All articles identified from the initial electronic search process will be imported into  
10 an Endnote library, and duplicates removed. The eligibility criteria will be applied to  
11 the results and all identified references screened independently by two reviewers (AL  
12 and TL) in a standard blinded way in four stages: (i) reviewing the titles and abstracts;  
13 (ii) retrieving and examining the full texts for inclusion; (iii) searching references lists  
14 from the full articles; and (iv) examining relevant references for additional studies.  
15 TB will be consulted when questions or ambiguity arise. The data extraction form will  
16 be pre-tested with 5 randomly selected trials.  
17  
18  
19  
20  
21  
22  
23

#### 24 *Quality assessment*

25 The quality of the randomized controlled trials will be assessed using the Cochrane  
26 Collaboration's tool for assessing risk of bias in randomized trials<sup>32</sup>. All data will be  
27 extracted and quality assessed by two reviewers. Disagreements at each step will be  
28 resolved by discussion. When no consensus is reached a third reviewer will resolve  
29 the discrepancy.  
30  
31  
32  
33

#### 34 *Data synthesis and analysis*

35  
36 The results of the studies included in the systematic review will be described  
37 in a summary table, consisting of author (year), purpose of the study, population  
38 targeted, study quality<sup>32</sup>, characteristics of the sample, outcome measures, statistical  
39 analyses performed (e.g., repeated measure ANOVA, ANCOVA or regression  
40 analysis) and the results on body composition and DE behaviors. The results of the  
41 impact of the intervention will be reported in effect sizes, such as Odd Ratios (OR)  
42 for dichotomous outcomes (e.g., satisfied and dissatisfied) or standardized mean  
43 differences (SMD) for continuous outcomes (e.g., BMI – Kg/m<sup>2</sup>). All effect sizes will  
44 be zero order. To facilitate interpretation and permit comparison with other SMD and  
45 standard effect sizes, the ORs will be converted to Cohen's d<sup>33</sup>. Cohen's d of 0.2 is a  
46 small effect size, 0.5 is medium and  $\geq 0.80$  is large<sup>33</sup>.  
47  
48  
49  
50  
51  
52  
53

54 An adequate number of studies ( $k > 5$ )<sup>34</sup> will trigger a meta-analysis of the  
55 findings with a random-effects model. The magnitude of the effect sizes might vary  
56  
57  
58  
59  
60

1  
2  
3 across the studies due to the differences in sample and outcomes of the studies. The  
4 pooled effect sizes will be computed, and each study will be weighted according to its  
5 sample size. Cochran's  $Q^{35}$  and  $I^2$  statistics<sup>36</sup> will assess the between-study  
6 heterogeneity, as measures of the percentage of total variation in estimated effects that  
7 is a consequence of heterogeneity rather than chance<sup>37</sup>. Significant heterogeneity is  
8 considered when the  $Q$  statistic has  $p < 0.05$ . An  $I^2$  statistic of 25% or less is  
9 considered low; 50% moderate and 75% high heterogeneity<sup>38</sup>. If study heterogeneity  
10 exceeds  $I^2 \geq 75\%$  (high), it will be explored through sensitivity analyses and meta-  
11 regression. The funnel plot will be inspected for publication bias, with a minimum of  
12 10 studies in the analysis<sup>39</sup>, through Duval and Tweedie's trim and fill method<sup>40</sup> and  
13 Egger's regression test<sup>41</sup>. All the analyses will be conducted using Comprehensive  
14 Meta-Analysis software for Mac.

15  
16 Subgroup analyses might be conducted to assess the possible effects of time  
17 differences between integrated prevention versus single obesity approach, and  
18 between certain DE behaviors and anthropometric measurements according to the  
19 following variables: population (e.g., normal weight adolescents vs. overweight/obese  
20 adolescents) and quality rating (high-rated vs. low-rated studies according to the  
21 Cochrane Collaboration's tool<sup>32</sup>). Age and sex differences in the impact of integrated  
22 prevention programs will be examined since DE behaviors are more common among  
23 older adolescents, girls and overweight/obese individuals<sup>15,42,43</sup>. Moreover, because  
24 previous studies<sup>44-47</sup> have found socioeconomic disparities in obesity and DE  
25 socioeconomic status, differences will be examined in ED and obesity risk factors in  
26 the prevention conditions.

27  
28 The strength of the evidence will be evaluated using the Grading of  
29 Recommendations Assessment, Development and Evaluation (GRADE) guidelines<sup>48</sup>.  
30 The following assessments will be made: (1) Quality rating for each study according  
31 to Cochrane Collaboration's tool<sup>32</sup>; (2) Cohen's  $d$  classification to evaluate the  
32 magnitude of individual or pooled effect size (SMD)<sup>33</sup>, if a meta-analysis is possible;  
33 (3) Cochran's  $Q^{35}$  and  $I^2$  statistic<sup>36</sup> for heterogeneity; and (4) risk of bias by  
34 visualizing the distribution of the funnel plot if there are at least 10 trials per  
35 analysis<sup>39</sup> through Duval and Tweedie's trim and fill method and Eggers's regression  
36 test.

### 37 38 39 40 41 42 43 44 45 46 47 48 49 50 51 52 53 54 55 56 57 58 59 60 **Gaps and limitations**

1  
2  
3 Several gaps and limitations should be noted in anticipation of the findings of  
4 the systematic review and meta-analysis. First, the body composition measurements  
5 reported in these studies will always be objective measurements (i.e., BMI, waist  
6 circumference and %body composition) which do not precisely measure percent body  
7 fat<sup>49-51</sup>. Second, DE will be assessed through self-reported measurements which might  
8 provide biased responses, since underreporting is highly prevalent, especially among  
9 girls and overweight/obese individuals<sup>42,46,47,52,53</sup>. Any studies that assess health  
10 preventive intervention impacts on self-reported or anthropometric data may  
11 potentially underestimate the effect of the intervention.  
12  
13  
14  
15  
16  
17  
18

### 19 **Implications**

20 This systematic review and meta-analysis aims to evaluate the impact of  
21 obesity and ED prevention programs for adolescents. Results of this study should  
22 provide new insights into the approaches tested thus far. The systematic review and  
23 meta-analysis may also identify specific gaps in the evidence, which would inform the  
24 agenda for future research and policy.  
25  
26  
27  
28  
29

### 30 **Amendments**

31 If there is a need to amend this protocol, the date, rationale, and a description  
32 of each protocol change will be reported.  
33  
34  
35  
36

### 37 **Ethics and dissemination**

38 Ethics approval will not be required as this is a protocol for systematic review  
39 and meta-analysis. This systematic review and meta-analysis will be published in a  
40 peer-reviewed journal which will be disseminated electronically and in print.  
41  
42  
43  
44

### 45 **Abbreviations**

46 DE: disordered eating; DSM-V: Diagnostic and Statistical Mental disorders 5<sup>th</sup>  
47 edition; ED: eating disordered; EDNOS: Eating Disorders Not Otherwise Specified;  
48 EPHPP: Effective Public Health Project; GRADE: Grading of Recommendations  
49 Assessment Development and Evaluation; HIC: High-income countries; LMIC: Low-  
50 middle-income countries.  
51  
52  
53  
54  
55  
56  
57  
58  
59  
60

## References

1. Hoelscher DM, Kirk S, Ritchie L, Cunningham-Sabo L, Academy Positions C. Position of the Academy of Nutrition and Dietetics: interventions for the prevention and treatment of pediatric overweight and obesity. *Journal of the Academy of Nutrition and Dietetics*. 2013;113(10):1375-1394.
2. Ng M, Fleming T, Robinson M, et al. Global, regional, and national prevalence of overweight and obesity in children and adults during 1980–2013: a systematic analysis for the Global Burden of Disease Study 2013. *The Lancet*. 2014;384(9945):766-781.
3. Verstraeten R, Roberfroid D, Lachat C, et al. Effectiveness of preventive school-based obesity interventions in low- and middle-income countries: a systematic review. *The American journal of clinical nutrition*. 2012;96(2):415-438.
4. Moreno LA. Obesity in children and adolescents. A critical review. *Endocrinología y Nutrición*. 2013;60:7-9.
5. Kann L, McManus T, Harris WA, et al. Youth Risk Behavior Surveillance - United States, 2015. *MMWR Surveill Summ*. 2016;65(6):1-174.
6. Reilly JJ, Kelly J. Long-term impact of overweight and obesity in childhood and adolescence on morbidity and premature mortality in adulthood: systematic review. *Int J Obes (Lond)*. 2011;35(7):891-898.
7. Wake M, Canterford L, Patton GC, et al. Comorbidities of overweight/obesity experienced in adolescence: longitudinal study. *Archives of disease in childhood*. 2010;95(3):162-168.
8. Tsiros MD, Coates AM, Howe PR, Grimshaw PN, Buckley JD. Obesity: the new childhood disability? *Obesity reviews : an official journal of the International Association for the Study of Obesity*. 2011;12(1):26-36.
9. Wang Y, Cai L, Wu Y, et al. What childhood obesity prevention programmes work? A systematic review and meta-analysis. *Obes Rev*. 2015;16(7):547-565.
10. Boff RM, Liboni RPA, Batista IPA, de Souza LH, Oliveira MDS. Weight loss interventions for overweight and obese adolescents: a systematic review. *Eating and weight disorders : EWD*. 2017;22(2):211-229.
11. Silveira JA, Taddei JA, Guerra PH, Nobre MR. The effect of participation in school-based nutrition education interventions on body mass index: a meta-analysis of randomized controlled community trials. *Preventive medicine*. 2013;56(3-4):237-243.
12. Guerra PH, Nobre MR, da Silveira JA, Taddei JA. School-based physical activity and nutritional education interventions on body mass index: a meta-analysis of randomised community trials - project PANE. *Preventive medicine*. 2014;61:81-89.
13. APA. *Diagnostic and Statistical Manual of Mental Disorders (DSM-5®)*. Arlington, VA: American Psychiatric Association;2013.
14. Smink FR, van Hoeken D, Oldehinkel AJ, Hoek HW. Prevalence and severity of DSM-5 eating disorders in a community cohort of adolescents. *Int J Eat Disord*. 2014;47(6):610-619.
15. Haines J, Neumark-Sztainer D. Prevention of obesity and eating disorders: a consideration of shared risk factors. *Health Educ Res*. 2006;21(6):770-782.

16. Leal GVS, Philippi ST, Polacow VO, Cordas TA, Alvarenga Mdos S. O que é comportamento de risco para transtornos alimentares em adolescentes? *Jornal Brasileiro de Psiquiatria*. 2013;62 (1):62-75.
17. Lopez-Guimera G, Neumark-Sztainer D, Hannan P, Fauquet J, Loth K, Sanchez-Carracedo D. Unhealthy weight-control behaviours, dieting and weight status: a cross-cultural comparison between North American and Spanish adolescents. *Eur Eat Disord Rev*. 2013;21(4):276-283.
18. Alvarenga Mde F, Scagliusi F, Philippi ST. Development and validity of the Disordered Eating Attitude Scale (DEAS). *Perceptual and motor skills*. 2010;2010(110):379-395.
19. Alvarenga Mdos S, Scagliusi FB, Philippi ST. Development and validity of the Disordered Eating Attitude Scale (DEAS). *Percept Mot Skills*. 2010;110(2):379-395.
20. Tanofsky-Kraff M, Shomaker LB, Wilfley DE, et al. Targeted prevention of excess weight gain and eating disorders in high-risk adolescent girls: a randomized controlled trial. *Am J Clin Nutr*. 2014;100(4):1010-1018.
21. Sanchez-Carracedo D, Fauquet J, Lopez-Guimera G, et al. The MABIC project: An effectiveness trial for reducing risk factors for eating disorders. *Behav Res Ther*. 2016;77:23-33.
22. Irving LM, Neumark-Sztainer D. Integrating the prevention of eating disorders and obesity: feasible or futile? *Preventive medicine*. 2002;34(3):299-309.
23. Sallis JF, Owen N, Fisher EB. Ecological models of health behavior, in Health behavior and health education. Theory, research, and practice. . In: San Francisco, CA: Jossey-Bass; 2008:465–485.
24. Balantekin KN, Birch LL, Savage JS. Family, friend, and media factors are associated with patterns of weight-control behavior among adolescent girls. *Eat Weight Disord*. 2017.
25. Frederick DA, Sandhu G, Scott T, Akbari Y. Reducing the negative effects of media exposure on body image: Testing the effectiveness of subvertising and disclaimer labels. *Body image*. 2016;17:171-174.
26. Loth K, Wall M, Larson N, Neumark-Sztainer D. Disordered eating and psychological well-being in overweight and nonoverweight adolescents: secular trends from 1999 to 2010. *The International journal of eating disorders*. 2015;48(3):323-327.
27. Sanchez-Carracedo D, Neumark-Sztainer D, Lopez-Guimera G. Integrated prevention of obesity and eating disorders: barriers, developments and opportunities. *Public health nutrition*. 2012;15(12):2295-2309.
28. Stice E, Shaw H, Marti CN. A meta-analytic review of eating disorder prevention programs: encouraging findings. *Annu Rev Clin Psychol*. 2007;3:207-231.
29. Moher D, Liberati A, Tetzlaff J, Altman DG, Group P. Preferred reporting items for systematic reviews and meta-analyses: the PRISMA statement. *PLoS medicine*. 2009;6(7):e1000097.
30. Neumark-Sztainer D. Integrating messages from the eating disorders field into obesity prevention. *Adolesc Med State Art Rev*. 2012;23(3):529-543.
31. Neumark-Sztainer D. Addressing obesity and other weight-related problems in youth. *Arch Pediatr Adolesc Med*. 2005;159(3):290-291.
32. Higgins JP, Altman DG, Gotzsche PC, et al. The Cochrane Collaboration's tool for assessing risk of bias in randomised trials. *BMJ*. 2011;343:d5928.
33. Cohen J. A power primer. *Psychol Bull* 1992;112:155–159.



- 1
  - 2
  - 3
  - 4
  - 5
  - 6
  - 7
  - 8
  - 9
  - 10
  - 11
  - 12
  - 13
  - 14
  - 15
  - 16
  - 17
  - 18
  - 19
  - 20
  - 21
  - 22
  - 23
  - 24
  - 25
  - 26
  - 27
  - 28
  - 29
  - 30
  - 31
  - 32
  - 33
  - 34
  - 35
  - 36
  - 37
  - 38
  - 39
  - 40
  - 41
  - 42
  - 43
  - 44
  - 45
  - 46
  - 47
  - 48
  - 49
  - 50
  - 51
  - 52
  - 53
  - 54
  - 55
  - 56
  - 57
  - 58
  - 59
  - 60
34. Davey J, Turner RM, Clarke MJ, Higgins PT. Characteristics of meta-analyses and their component studies in the Cochrane Database of Systematic Reviews: a cross-sectional, descriptive analysis. *BMC public health*. 2011;11.
35. Cochran WG. The  $\chi$  test of goodness of fit. *Ann Math Stat* 1952;23:315–345.
36. Higgins JP, Thompson SG. Quantifying heterogeneity in a meta-analysis. *Statistics in medicine*. 2002;21:1539–1558.
37. Huedo-Medina TB, Sánchez-Meca J, Marín-Martínez F, J. B. Assessing heterogeneity in meta-analysis: Q statistic or I<sup>2</sup> index? *Psychol Methods* 2006;11:193–206.
38. Higgins JP, Thompson SG, Spiegelhalter DJ. A re-evaluation of random-effects meta-analysis. *J R Stat Soc Ser A Stat Soc*. 2009;172:137–159.
39. Sutton AJ, Duval SJ, Tweedie RL, Abrams KR, Jones DR. Empirical assessment of effect of publication bias on meta-analyses. *BMJ*. 2000;320(1574–7).
40. Duval S, Tweedie R. A nonparametric “trim and fill” method of accounting for publication bias in meta-analysis. *J Am Stat Assoc*. 2000;95:89–98.
41. Egger M, Davey Smith G, Schneider M, Minder C. Bias in meta-analysis detected by a simple, graphical test. *BMJ* 1997;315:629–634.
42. Loth K, Wall M, Larson N, Neumark-Sztainer D. Disordered eating and psychological well-being in overweight and nonoverweight adolescents: Secular trends from 1999 to 2010. *The International journal of eating disorders*. 2015.
43. Suisman JL, Thompson JK, Keel PK, et al. Genetic and environmental influences on thin-ideal internalization across puberty and preadolescent, adolescent, and young adult development. *The International journal of eating disorders*. 2014;47(7):773–783.
44. Stamatakis E, Wardle J, Cole TJ. Childhood obesity and overweight prevalence trends in England: evidence for growing socioeconomic disparities. *Int J Obes (Lond)*. 2010;34(1):41–47.
45. Jaacks LM, Slining MM, Popkin BM. Recent trends in the prevalence of under- and overweight among adolescent girls in low- and middle-income countries. *Pediatric obesity*. 2015.
46. Spencer RA, Rehman L, Kirk SF. Understanding gender norms, nutrition, and physical activity in adolescent girls: a scoping review. *The international journal of behavioral nutrition and physical activity*. 2015;12:6.
47. Goldschmidt AB, Wall MM, Loth KA, Neumark-Sztainer D. Risk Factors for Disordered Eating in Overweight Adolescents and Young Adults. *Journal of pediatric psychology*. 2015;40(10):1048–1055.
48. Atkins D, Best D, Briss PA, et al. Grading quality of evidence and strength of recommendations. *BMJ* 2004;328:1490–1494.
49. Bogart LM, Elliott MN, Cowgill BO, et al. Two-Year BMI Outcomes From a School-Based Intervention for Nutrition and Exercise: A Randomized Trial. *Pediatrics*. 2016;137(5).
50. Sharif Ishak SI, Chin YS, Mohd Taib MN, Mohd Shariff Z. School-based intervention to prevent overweight and disordered eating in secondary school Malaysian adolescents: a study protocol. *BMC public health*. 2016;16(1):1101.
51. Pbert L, Druker S, Barton B, et al. A School-Based Program for Overweight and Obese Adolescents: A Randomized Controlled Trial. *J Sch Health*. 2016;86(10):699–708.

- 1  
2  
3 52. Dunstan CJ, Paxton SJ, McLean SA. An evaluation of a body image  
4 intervention in adolescent girls delivered in single-sex versus co-educational  
5 classroom settings. *Eating behaviors*. 2016.  
6 53. Datar A, Chung PJ. Accuracy of Weight Perceptions in a Nationally  
7 Representative Cohort of US 8th Grade Adolescents. *Academic pediatrics*.  
8 2015.  
9

10  
11 **Authors' contributors**

12 ACBL, the guarantor of the protocol, drafted the protocol and registered it in  
13 PROSPERO. TB reviewed and commented on the protocol in PROSPERO. ACBL,  
14 DT, KLLD, TN, STP, TL, LAVI and TB all reviewed and commented on this  
15 protocol.  
16  
17  
18  
19

20  
21 **Funding statement**

22  
23  
24 This work was supported by the USDA/ARS Children's Nutrition Research Center,  
25 Department of Pediatrics, Baylor College of Medicine, Houston, TX under  
26 Cooperative Agreement Number 58-6250-6001.  
27  
28  
29

30  
31 **Competing interests statement**

32 No competing of interest  
33  
34  
35  
36  
37  
38  
39  
40  
41  
42  
43  
44  
45  
46  
47  
48  
49  
50  
51  
52  
53  
54  
55  
56  
57  
58  
59  
60

Figure 1 – Scheme of the weight related behaviors

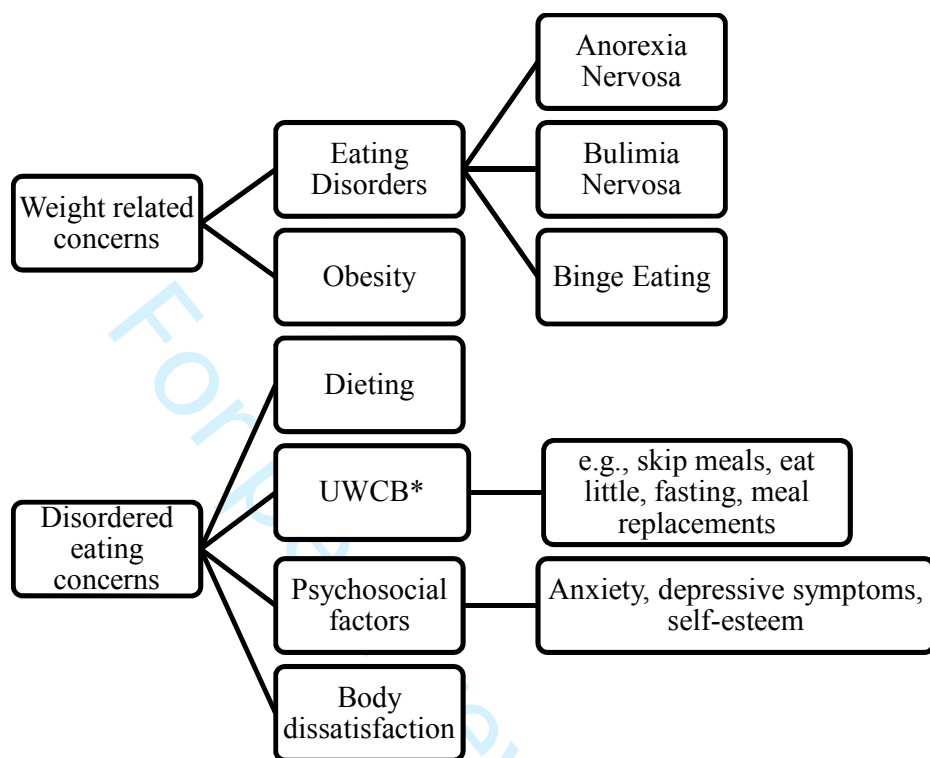

\*UWCB = Unhealthy Weight Control Behaviors



**PRISMA-P (Preferred Reporting Items for Systematic review and Meta-Analysis Protocols) 2015 checklist: recommended items to address in a systematic review protocol\***

| Section and topic                 | Item No | Checklist item                                                                                                                                                                                                                | Page                           |
|-----------------------------------|---------|-------------------------------------------------------------------------------------------------------------------------------------------------------------------------------------------------------------------------------|--------------------------------|
| <b>ADMINISTRATIVE INFORMATION</b> |         |                                                                                                                                                                                                                               |                                |
| Title:                            |         |                                                                                                                                                                                                                               |                                |
| Identification                    | 1a      | Identify the report as a protocol of a systematic review                                                                                                                                                                      | 1                              |
| Update                            | 1b      | If the protocol is for an update of a previous systematic review, identify as such                                                                                                                                            | N/A                            |
| Registration                      | 2       | If registered, provide the name of the registry (such as PROSPERO) and registration number                                                                                                                                    | PROSPERO <b>CRD42017076547</b> |
| Authors:                          |         |                                                                                                                                                                                                                               |                                |
| Contact                           | 3a      | Provide name, institutional affiliation, e-mail address of all protocol authors; provide physical mailing address of corresponding author                                                                                     | 1                              |
| Contributions                     | 3b      | Describe contributions of protocol authors and identify the guarantor of the review                                                                                                                                           | 9                              |
| Amendments                        | 4       | If the protocol represents an amendment of a previously completed or published protocol, identify as such and list changes; otherwise, state plan for documenting important protocol amendments                               | N/A                            |
| Support:                          |         |                                                                                                                                                                                                                               |                                |
| Sources                           | 5a      | Indicate sources of financial or other support for the review                                                                                                                                                                 | 9/10                           |
| Sponsor                           | 5b      | Provide name for the review funder and/or sponsor                                                                                                                                                                             | 9/10                           |
| Role of sponsor or funder         | 5c      | Describe roles of funder(s), sponsor(s), and/or institution(s), if any, in developing the protocol                                                                                                                            | 9/10                           |
| <b>INTRODUCTION</b>               |         |                                                                                                                                                                                                                               |                                |
| Rationale                         | 6       | Describe the rationale for the review in the context of what is already known                                                                                                                                                 | 2 to 5                         |
| Objectives                        | 7       | Provide an explicit statement of the question(s) the review will address with reference to participants, interventions, comparators, and outcomes (PICO)                                                                      | 5                              |
| <b>METHODS</b>                    |         |                                                                                                                                                                                                                               |                                |
| Eligibility criteria              | 8       | Specify the study characteristics (such as PICO, study design, setting, time frame) and report characteristics (such as years considered, language, publication status) to be used as criteria for eligibility for the review | 5-6                            |
| Information sources               | 9       | Describe all intended information sources (such as electronic databases, contact with study authors, trial registers or other grey literature sources) with planned dates of coverage                                         | 6                              |
| Search strategy                   | 10      | Present draft of search strategy to be used for at least one electronic database, including planned limits,                                                                                                                   | 6                              |

|                                    |     |                                                                                                                                                                                                                                                  |     |
|------------------------------------|-----|--------------------------------------------------------------------------------------------------------------------------------------------------------------------------------------------------------------------------------------------------|-----|
|                                    |     | such that it could be repeated                                                                                                                                                                                                                   |     |
| Study records:                     |     |                                                                                                                                                                                                                                                  |     |
| Data management                    | 11a | Describe the mechanism(s) that will be used to manage records and data throughout the review                                                                                                                                                     | 6   |
| Selection process                  | 11b | State the process that will be used for selecting studies (such as two independent reviewers) through each phase of the review (that is, screening, eligibility and inclusion in meta-analysis)                                                  | 6   |
| Data collection process            | 11c | Describe planned method of extracting data from reports (such as piloting forms, done independently, in duplicate), any processes for obtaining and confirming data from investigators                                                           | 7   |
| Data items                         | 12  | List and define all variables for which data will be sought (such as PICO items, funding sources), any pre-planned data assumptions and simplifications                                                                                          | 6   |
| Outcomes and prioritization        | 13  | List and define all outcomes for which data will be sought, including prioritization of main and additional outcomes, with rationale                                                                                                             | 6   |
| Risk of bias in individual studies | 14  | Describe anticipated methods for assessing risk of bias of individual studies, including whether this will be done at the outcome or study level, or both; state how this information will be used in data synthesis                             | 7   |
| Data synthesis                     | 15a | Describe criteria under which study data will be quantitatively synthesised                                                                                                                                                                      | 7-8 |
|                                    | 15b | If data are appropriate for quantitative synthesis, describe planned summary measures, methods of handling data and methods of combining data from studies, including any planned exploration of consistency (such as $I^2$ , Kendall's $\tau$ ) | 7-8 |
|                                    | 15c | Describe any proposed additional analyses (such as sensitivity or subgroup analyses, meta-regression)                                                                                                                                            | 7-8 |
|                                    | 15d | If quantitative synthesis is not appropriate, describe the type of summary planned                                                                                                                                                               | N/A |
| Meta-bias(es)                      | 16  | Specify any planned assessment of meta-bias(es) (such as publication bias across studies, selective reporting within studies)                                                                                                                    | N/A |
| Confidence in cumulative evidence  | 17  | Describe how the strength of the body of evidence will be assessed (such as GRADE)                                                                                                                                                               | 8   |

**\* It is strongly recommended that this checklist be read in conjunction with the PRISMA-P Explanation and Elaboration (cite when available) for important clarification on the items. Amendments to a review protocol should be tracked and dated. The copyright for PRISMA-P (including checklist) is held by the PRISMA-P Group and is distributed under a Creative Commons Attribution Licence 4.0.**

*From: Shamseer L, Moher D, Clarke M, Ghersi D, Liberati A, Petticrew M, Shekelle P, Stewart L, PRISMA-P Group. Preferred reporting items for systematic review and meta-analysis protocols (PRISMA-P) 2015: elaboration and explanation. BMJ. 2015 Jan 2;349(jan02 1):g7647.*

# BMJ Open

## Obesity and eating disorders in integrative prevention programs for adolescents: protocol for a systematic review and meta-analysis

|                                 |                                                                                                                                                                                                                                                                                                                                                                                                                                                                                                                                                                                                                                                                                                                          |
|---------------------------------|--------------------------------------------------------------------------------------------------------------------------------------------------------------------------------------------------------------------------------------------------------------------------------------------------------------------------------------------------------------------------------------------------------------------------------------------------------------------------------------------------------------------------------------------------------------------------------------------------------------------------------------------------------------------------------------------------------------------------|
| Journal:                        | <i>BMJ Open</i>                                                                                                                                                                                                                                                                                                                                                                                                                                                                                                                                                                                                                                                                                                          |
| Manuscript ID                   | bmjopen-2017-020381.R1                                                                                                                                                                                                                                                                                                                                                                                                                                                                                                                                                                                                                                                                                                   |
| Article Type:                   | Protocol                                                                                                                                                                                                                                                                                                                                                                                                                                                                                                                                                                                                                                                                                                                 |
| Date Submitted by the Author:   | 19-Feb-2018                                                                                                                                                                                                                                                                                                                                                                                                                                                                                                                                                                                                                                                                                                              |
| Complete List of Authors:       | Barco Leme, Ana Carolina; Baylor College of Medicine, Children's Nutrition Research Center<br>Thompson, Debbe ; Baylor College of Medicine, Children's Nutrition Research Center<br>Lenz Dunker, Karin ; Universidade Federal de Sao Paulo Escola Paulista de Medicina, Department of Psychiatric<br>Nicklas, Theresa; Baylor College of Medicine, Children's Nutrition Research Center<br>Tucunduva Philippi, Sonia ; Universidade de Sao Paulo<br>Lopez, Tabbetha ; University of Houston College of Liberal Arts and Social Sciences, Health and Human Performance<br>Vézina-Im, Lydi-Anne; Baylor College of Medicine, Pediatrics-Nutrition<br>Baranowski, Tom; Baylor College of Medicine, Department of Pediatrics |
| <b>Primary Subject Heading</b>: | Public health                                                                                                                                                                                                                                                                                                                                                                                                                                                                                                                                                                                                                                                                                                            |
| Secondary Subject Heading:      | Nutrition and metabolism, Research methods                                                                                                                                                                                                                                                                                                                                                                                                                                                                                                                                                                                                                                                                               |
| Keywords:                       | Adolescent, obesity prevention, Eating disorders < PSYCHIATRY, systematic review, disordered eating                                                                                                                                                                                                                                                                                                                                                                                                                                                                                                                                                                                                                      |
|                                 |                                                                                                                                                                                                                                                                                                                                                                                                                                                                                                                                                                                                                                                                                                                          |

SCHOLARONE™  
Manuscripts

1  
2  
3 **1 Obesity and eating disorders in integrative prevention programs for adolescents: protocol**  
4 **for a systematic review and meta-analysis**  
5  
6  
7

8 4 Ana Carolina Barco Leme<sup>1</sup>; Debbe Thompson<sup>1</sup>, Karin Louise Lenz Dunker<sup>2</sup>, Theresa Nicklas<sup>1</sup>,  
9 5 Sonia Tucunduva Philippi<sup>3</sup>, Tabbetha Lopez<sup>4</sup>, Lydi-Anne Vézina-Im<sup>1</sup>; Tom Baranowski<sup>1</sup>  
10  
11  
12

13 7 <sup>1</sup> Children's Nutrition Research Center, Baylor College of Medicine, Houston, Texas, USA  
14

15 8 <sup>2</sup> Department of Psychiatry, Federal University of São Paulo, São Paulo, Brazil  
16

17 9 <sup>3</sup> School of Public Health, University of São Paulo, São Paulo, Brazil  
18

19 10 <sup>4</sup> University of Houston, College of Liberal Arts and Social Sciences, Health and Human  
20 11 Performance, Houston, Texas, USA  
21  
22

23 13 **Corresponding author:** Ana Carolina Barco Leme  
24

25 14 Children's Nutrition Research Center, Baylor College of Medicine.  
26

27 15 1100 Bates Street, Houston, TX, 77030-3411, USA.  
28

29 16 E-mail: acarol.leme@gmail.com  
30

31 17 Telephone: +1(832)209-0406.  
32  
33

34 19 **Word count:** 2710  
35  
36

37 21 **Abstract for protocol**  
38  
39

40 23 **Introduction:** Obesity and eating disorders are public health problems that have lifelong  
41 24 financial and personal costs and common risk factors e.g., body dissatisfaction, weight teasing  
42 25 and disordered eating. Obesity prevention interventions might lead to the development of an  
43 26 eating disorder since focusing on weight may contribute to excessive concern with diet and  
44 27 weight. Therefore, the proposed research will assess whether integrating obesity and eating  
45 28 disorder prevention procedures ("integrated approach") do better than single approach  
46 29 interventions in preventing obesity among adolescents, and if integrated approaches influence  
47 30 weight-related outcomes. **Methods and analysis:** Integrated obesity and eating disorder  
48 31 prevention interventions will be identified. Randomized controlled trials and quasi-experimental  
49 32 trials reporting data on adolescents ranging from 10 to 19 years of age from both sexes will be  
50  
51  
52  
53  
54  
55  
56  
57  
58  
59  
60

1 included. Outcomes of interest include body composition, unhealthy weight control behaviors,  
2 and body satisfaction measurements. MEDLINE/PubMed, PsycINFO, Web of Science and  
3 SciELO will be searched. Data will be extracted independently by two reviewers using a  
4 standardized data extraction form. Trial quality will be assessed using the Cochrane  
5 Collaboration criteria. The effects of integrated vs. single approach intervention studies will be  
6 compared using systematic review procedures. If an adequate number of studies report data on  
7 integrated interventions among similar populations ( $k > 5$ ), a meta-analysis with random-effects  
8 will be conducted. Sensitivity analyses and meta-regression will be performed only if between-  
9 study heterogeneity is high ( $I^2 \geq 75\%$ ). **Ethics and dissemination:** Ethics approval will not be  
10 required as this is a systematic review of published studies. The findings will be disseminated  
11 through conference presentations and peer-reviewed journals.

12

### 13 **Strengths and Limitations of this study**

14

- 15 • First review and meta-analysis of stand-alone obesity prevention programs vs.  
16 integrated obesity and eating disorder prevention approaches on body composition.
- 17 • Body composition measures do not precisely measure body fat
- 18 • Disordered eating will be measured using self-reported measures
- 19 • Age will be limited to 10- to 19-year-old adolescents

20

21 **Keywords:** Adolescent, obesity prevention, eating disorders, systematic review, disordered  
22 eating

23

### 24 **Background**

25

26 Pediatric overweight and obesity are worldwide public health concerns<sup>1</sup>, with the highest  
27 rates in the USA where 28.8% of boys and 29.7% of girls are overweight or obese<sup>2</sup>. Western  
28 low- and middle-income countries (LMIC) also face unhealthy child weight, e.g., 24.3% of  
29 individuals between 10-19 years of age in Brazil were overweight or obese<sup>2</sup>. Some evidence  
30 indicates a rapid increase in prevalence levels in LMICs as high or even higher than those found  
31 in high-income countries (HICs)<sup>3</sup>. Obesity has been associated with long and short-term physical

1 health conditions, such as cardio-metabolic diseases<sup>4</sup>, certain types of cancers<sup>5</sup>, and mental  
2 health concerns<sup>6,7</sup>. Overweight youth are also at high risk of becoming obese adults<sup>8</sup>, indicating  
3 prevention should be initiated in youth.

4 Prior systematic reviews have examined childhood obesity prevention studies<sup>3,9,10</sup>.  
5 Findings, however, have been mixed. In one review of school-based interventions to prevent  
6 obesity among children and adolescents, an average difference between the intervention and  
7 control groups was  $-0.33\text{kg/m}^2$  ( $-0.55, -0.11, 95\%CI$ ), with 84% of this effect explained by the  
8 highest quality studies<sup>11</sup>. Alternatively, another reported a difference of 0.03 (95%CI: 0.09 to  
9 0.03,  $p=0.03$ ) with high heterogeneity ( $I^2=87\%$ )<sup>12</sup>. Thus, evidence regarding the effectiveness of  
10 school-based obesity prevention interventions to reduce BMI in youth is mixed with high  
11 heterogeneity among studies. Narrower age groups who experience common problems and  
12 receive interventions appropriate to these common problems may be more effective.

13 Eating disorders are illnesses in which the people experience severe disturbances in their  
14 eating behaviors and related thoughts and emotions. People with eating disorders typically  
15 become pre-occupied with food and their body weight<sup>13</sup>. In the Diagnostic and Statistical Manual  
16 of Mental Disorders 5, the eating disorders section was renamed “Feeding and Eating Disorders”  
17 and specified three eating disorders: anorexia nervosa, bulimia nervosa and binge eating  
18 disorder; and three feeding disorders: pica, rumination disorder, and avoidant/restrictive food  
19 disorder<sup>13</sup>. These categories, and associated criteria served to decrease the frequency of the  
20 diagnostic category “eating disorder not otherwise specified”, a heterogeneous not well-defined  
21 group of eating disorders. Eating disorder not otherwise specified was the most common  
22 diagnosis in clinical and community samples of adolescents, accounting for around 80% of all  
23 eating disorder diagnoses, with psychopathology and adverse consequences comparable to  
24 anorexia nervosa and bulimia nervosa<sup>13,14</sup>.

25 Disordered eating behaviors and attitudes are part of the eating disorders continuum and  
26 include obsessively thinking about food and calories, becoming angry when hungry, being  
27 unable to select what to eat, seeking food to compensate for psychological problems, eating until  
28 feeling sick, and presenting unreal myths and beliefs about eating and weight<sup>15</sup>. Disordered  
29 eating is not limited to those diagnosed with eating disorders. Indeed, many individuals  
30 experience disordered eating behaviors, beliefs, and feelings toward food but are unaware that  
31 they are manifesting “abnormal” behaviors<sup>16</sup>.

1  
2  
3 1 Most interventions in the field of eating disorders can be classified as primary prevention  
4 programs, aiming to reduce risk factors. In general, these interventions focus on girls as a target  
5 2 group based on the observation, that girls have an increased chance of developing an eating  
6 3 disorder, especially anorexia and bulimia nervosa<sup>17</sup>. Schools are the most common setting for the  
7 4 existing evaluated programs<sup>17</sup>. Earlier eating disorder programs tended to employ fear appeals,  
8 5 threat appeals or fear arousing communications<sup>17,18</sup>. These methods have been increasingly  
9 6 abandoned, since they did not show an effect or might have even been “more harmful than  
10 7 beneficial”<sup>17</sup>. More recent eating disorder prevention programs focused on protective factors  
11 8 such as life skills and emotion regulation competence<sup>19,20</sup>. The PriMa (Primary prevention of  
12 9 Anorexia Nervosa) program<sup>17</sup>, was a new type of prevention program for girls up to the age of  
13 10 12. This scientifically based intervention attempted to prevent eating disorders and reduce  
14 11 disordered eating behaviors by primarily focusing on problems associated with anorexia nervosa.  
15 12 The nine lesson-program utilized standardized posters and guidelines to encourage group  
16 13 discussions. The intervention group reported significant improvements in body self-esteem,  
17 14 figure dissatisfaction, knowledge and eating attitudes. Also, instead of interventionists, the  
18 15 program used school teachers to deliver the intervention.  
19 16

20 17 A recent systematic review and meta-analyses<sup>20</sup> quantified the effectiveness of eating  
21 18 disorder preventive randomized controlled trials for children, adolescents and youth. A total of  
22 19 112 studies were included; 58% of the trials had high risk of bias. Findings indicated small to  
23 20 moderate effect sizes in reducing eating disorder risk factors. It also revealed that promising  
24 21 preventive interventions for eating disorders risk factors may include cognitive dissonance  
25 22 therapy, cognitive behavioral therapy and media literacy. Whether these interventions lower  
26 23 eating disorder incidence is, however, uncertain, there is a need for studies that combine eating  
27 24 disorder and obesity prevention<sup>20</sup>.

28 25 Although eating disorder prevention programs included content of relevance to obesity  
29 26 prevention (e.g., promotion of healthy weight management) few assessed the impact on weight  
30 27 status or other obesity-related outcomes<sup>18,20,21</sup>.

31 28 Being overweight during childhood increases the chances of having an eating disorder  
32 29 during adulthood (compared to normal weight controls)<sup>17</sup>. Common obesity and eating disorders  
33 30 risk factors can be categorized into three levels according to the Social Ecological Model<sup>22</sup>:  
34 31 individual (e.g., sex, age and weight-status), social (e.g., media, weight teasing and ideal beauty



1  
2  
3 1 pattern) and psychological (e.g., self-esteem and body satisfaction). Several studies have  
4 2 described the co-presence of these factors, which could be considered risks for the development  
5 3 of eating disorders and obesity<sup>23-25</sup>. Thus, an integrated approach could address the differences in  
6 4 these prevention philosophies, e.g., eating behaviors (dieting vs. no dieting) and body weight  
7 5 (lose vs. accept weight)<sup>19</sup>.

8  
9  
10 6 Some interventions addressed both obesity and eating disorders in prevention  
11 7 interventions because of the efficiency in addressing two conditions with a single intervention  
12 8 and a possible reduced risk of inadvertently causing eating disorders while trying to prevent  
13 9 obesity<sup>26-28</sup>, e.g., strategies to prevent obesity (monitoring intake and portion control) might  
14 10 unintentionally promote shape concerns and disordered eating. Integrating obesity and eating  
15 11 disorder prevention programs may prove easier and more cost-effective than treating them  
16 12 separately, and healthy nutrition and physical activity are the focus of both eating disorders and  
17 13 obesity prevention programs<sup>29</sup>. Body dissatisfaction concerns were also addressed in both  
18 14 approaches, but have mismatched messages. For example, some obesity prevention programs  
19 15 considered it acceptable to be unhappy about being overweight in order to motivate restricting  
20 16 the amount and content of food consumed to reduce body weight<sup>29</sup>, while eating disorder  
21 17 prevention programs promoted self-acceptance at any weight, discouraging self-consciousness  
22 18 about dietary intake. However, data supporting these alternative viewpoints are scarce<sup>29</sup>.

23 19 Due to the increasing prevalence of obesity and eating disorders<sup>21,26</sup> and shared common  
24 20 risk factors, i.e., body dissatisfaction, unhealthy weight control behaviors/dieting and weight  
25 21 teasing (Figure 1) there have been calls for integration to address these common concerns<sup>26</sup>. For  
26 22 instance, obesity and eating disorders can co-occur in the same individual<sup>26</sup>. A cross-cultural  
27 23 comparison between US and Spanish adolescents found dieting and use of unhealthy weight  
28 24 control behaviors were higher among overweight and obese youth and concluded that prevention  
29 25 interventions should address the broad spectrum of eating and weight-related problems<sup>30</sup>.

30 26 In summary, obesity and eating disorders have common risk factors with adverse health  
31 27 outcomes, mainly among overweight and female adolescents. Systematic reviews and meta-  
32 28 analyses have only analyzed results for single approaches (i.e., obesity or eating disorders  
33 29 prevention) and the results have been mixed. Interventions that integrate obesity and eating  
34 30 disorders prevention components might be more effective. A review of such interventions might  
35 31 provide insight into the mechanisms of effect and inform interventions that address both



1 problems simultaneously. To the authors' knowledge, no previous review has identified the  
2 impact of integrated obesity and eating disorders prevention programs for adolescents. The  
3 present systematic review will answer the following questions:

- 4 • Do integrated obesity and eating disorders interventions do better than obesity-only  
5 prevention interventions in improving adolescents' health behavior outcomes and  
6 maintaining healthy weight status?
- 7 • Do integrated interventions promote being more satisfied with one's body and reduce  
8 unhealthy weight control behaviors in adolescents?

## 10 **Methods and analysis**

12 The study protocol was accepted by PROSPERO ([www.crd.york.ac.uk/PROSPERO](http://www.crd.york.ac.uk/PROSPERO)) in  
13 October 2017 (CRD42017076547). This protocol follows the Preferred Reporting Items for  
14 Systematic Review and Meta-Analysis Protocol (PRISMA-P) checklist<sup>31</sup>. Modifications to the  
15 protocol will be tracked and dated in PROSPERO.

### 17 **Patient and public involvement**

18 Patients and or public were not involved in this current study

### 20 **Criteria for considering studies for this review**

#### 21 ***Inclusion criteria***

22 *Population:* adolescents 10 to 19 years of age from both sexes. Adolescents in this age range are  
23 at increased risk for unhealthy weight control behaviors and body satisfaction, shared risk factors  
24 for obesity and eating disorders<sup>19,32</sup>. Most published integrated prevention studies are in this age  
25 group.

26 *Type of outcomes:* (1) body composition measurements (i.e., body mass index (BMI), waist  
27 circumference or percent body fat); (2) weight control behaviors and/or scales that assess the risk  
28 for an eating disorders (such as the Eating Attitudes Test (EAT-26), Sociocultural Attitudes  
29 Towards Appearance Questionnaire 3 (SATAQ-3) and Eating Disorder Examination  
30 Questionnaire (EDE-Q)); (3) self-reported scales on body satisfactions and; (4) other  
31 psychological markers (e.g., anxiety, depression and/or self-esteem inventories). Inclusion of at

1  
2  
3 1 least one of the weight control behaviors and/or scales must have been used to assess the risk for  
4 eating disorders<sup>16,19,33,34</sup>.

5  
6 3 We define “obesity and eating disorder prevention studies” to be those in which the  
7 authors explicitly state they are targeting both sets of outcomes. “Obesity prevention alone”  
8 studies are defined to be those in which the authors state only an obesity prevention objective  
9 even if mentioning eating disorder prevention. Some obesity prevention studies collect measures  
10 of eating disorders to assess possible unanticipated eating disorder side effects. These will be  
11 considered obesity prevention alone studies.  
12

13  
14 9 *Study design:* Quasi-randomized controlled trials and randomized controlled trials assessing the  
15 impact of integrated or obesity- only prevention interventions.  
16

17 10 *Type of studies:* Quantitative outcome analyses will be included in the systematic review and  
18 meta-analysis.  
19

20  
21  
22  
23  
24 13

## 25 14 **Search strategy**

26  
27 15

28  
29 16 A structured electronic search will employ all publication years (up to 2018) using four  
30 databases and terms will be searched for all text: Medical Literature Library of Medicine  
31 (MEDLINE) via PubMed ( $\geq 1979$ ), PsycINFO of the American Psychological Association  
32 ( $\geq 1954$ ), Web of Science via Clarivate Analytics ( $\geq 1983$ ) and Scientific Electronic Library  
33 (SciELO) via BIREME Latin American and Caribbean Center on Health Science Information  
34 ( $\geq 1997$ ). Systematic searchers will be developed from this model, applied in MEDLINE:  
35 (Obesity) OR Overweight) OR Weight related problems) AND eating disorder) OR weight  
36 control behaviors) AND adolescents) OR youth) OR teenagers) OR girls) OR boys) AND  
37 prevent\*) OR strategies) OR randomized controlled trial. Congress abstracts, dissertations,  
38 theses, and articles published in journals without peer-review will not be included in the review.  
39 Only studies written in English, German, Spanish or Portuguese will be included. The results of  
40 this search strategy will be reported in a PRISMA flowchart<sup>31</sup>. The bibliographies of papers that  
41 match inclusion criteria will be searched by hand to identify further relevant references, which  
42 will be subjected to the same screening and selection process. The full search strategy is referred  
43 in the supplementary file (Supplement figure 1).  
44  
45  
46  
47  
48  
49  
50  
51  
52  
53  
54  
55 30  
56  
57  
58  
59  
60

### 1 *Screening and data extraction*

2 All articles identified from the initial electronic search process will be imported into an  
3 Endnote library, and duplicates removed. The eligibility criteria will be applied to the results and  
4 all identified references screened independently by two reviewers (AL and TL) in a standard  
5 blinded way in four stages: (i) reviewing the titles and abstracts; (ii) retrieving and examining the  
6 full texts for inclusion; (iii) searching references lists from the full articles; and (iv) examining  
7 relevant references for additional studies. TB will be consulted when questions or ambiguity  
8 arise. The data extraction form will be pre-tested with 5 randomly selected trials.

### 10 *Quality assessment*

11 The quality of the randomized controlled trials will be assessed using the Cochrane  
12 Collaboration's tool for assessing risk of bias in randomized trials<sup>35</sup>. All data will be extracted  
13 and quality assessed by two reviewers. Disagreements at each step will be resolved by  
14 discussion. When no consensus is reached a third reviewer will resolve the discrepancy.

### 16 *Data synthesis and analysis*

17 The results of the studies included in the systematic review will be described in a  
18 summary table, consisting of author (year), purpose of the study, population targeted, study  
19 quality<sup>35</sup>, characteristics of the sample, outcome measures, statistical analyses performed (e.g.,  
20 repeated measure ANOVA, ANCOVA or regression analysis) and the results on body  
21 composition and disordered eating behaviors. The results of the impact of the intervention will  
22 be reported in effect sizes, such as Odd Ratios (OR) for dichotomous outcomes (e.g., satisfied  
23 and dissatisfied) or standardized mean differences (SMD) for continuous outcomes (e.g., BMI –  
24 Kg/m<sup>2</sup>). All effect sizes will be zero order. To facilitate interpretation and permit comparison  
25 with other SMD and standard effect sizes, the ORs will be converted to Cohen's d<sup>36</sup>. Cohen's d  
26 of 0.2 is a small effect size, 0.5 is medium and  $\geq 0.80$  is large<sup>36</sup>.

27 An adequate number of studies ( $k > 5$ )<sup>37</sup> will trigger a meta-analysis of the findings with a  
28 random-effects model. The magnitude of the effect sizes might vary across the studies due to the  
29 differences in sample and outcomes of the studies. The pooled effect sizes will be computed, and  
30 each study will be weighted according to its sample size. Cochran's Q<sup>38</sup> and I<sup>2</sup> statistics<sup>39</sup> will  
31 assess the between-study heterogeneity, as measures of the percentage of total variation in  
32 estimated effects that is a consequence of heterogeneity rather than chance<sup>40</sup>. Significant

1  
2  
3 1 heterogeneity is considered when the Q statistic has  $p < 0.05$ . An  $I^2$  statistic of 25% or less is  
4 considered low; 50% moderate and 75% high heterogeneity<sup>41</sup>. If study heterogeneity exceeds  
5  
6 3  $I^2 \geq 75%$  (high), it will be explored through sensitivity analyses and meta-regression. The funnel  
7  
8 4 plot will be inspected for publication bias, with a minimum of 10 studies in the analysis<sup>42</sup>,  
9  
10 5 through Duval and Tweedie's trim and fill method<sup>43</sup> and Egger's regression test<sup>44</sup>. All the  
11  
12 6 analyses will be conducted using Comprehensive Meta-Analysis software.

13  
14 7 Subgroup analyses might be conducted to assess the possible effects of time differences  
15  
16 8 between integrated prevention versus single obesity approach, and between certain disordered  
17  
18 9 eating behaviors and anthropometric measurements according to the following variables:  
19  
20 10 population (e.g., normal weight adolescents vs. overweight/obese adolescents) and quality rating  
21  
22 11 (high-rated vs. low-rated studies according to the Cochrane Collaboration's tool<sup>35</sup>). Age and sex  
23  
24 12 differences in the impact of integrated prevention programs will be examined since disorder  
25  
26 13 eating behaviors are more common among older adolescents, girls and overweight/obese  
27  
28 14 individuals<sup>26,45,46</sup>. Moreover, because previous studies<sup>47-50</sup> have found socioeconomic disparities  
29  
30 15 in obesity and disorder eating socioeconomic status, differences will be examined in eating  
31  
32 16 disorder and obesity risk factors in the prevention conditions.

33  
34 17 The strength of the evidence will be evaluated using the Grading of Recommendations  
35  
36 18 Assessment, Development and Evaluation (GRADE) guidelines<sup>51</sup>. The following assessments  
37  
38 19 will be made: (1) Quality rating for each study according to Cochrane Collaboration's tool<sup>35</sup>; (2)  
39  
40 20 Cohen's d classification to evaluate the magnitude of individual or pooled effect size (SMD)<sup>36</sup>, if  
41  
42 21 a meta-analysis is possible; (3) Cochran's  $Q$ <sup>38</sup> and  $I^2$  statistic<sup>39</sup> for heterogeneity; and (4) risk of  
43  
44 22 bias by visualizing the distribution of the funnel plot if there are at least 10 trials per analysis<sup>42</sup>  
45  
46 23 through Duval and Tweedie's trim and fill method and Eggers's regression test.

47  
48  
49  
50  
51  
52  
53  
54  
55  
56  
57  
58  
59  
60

## 25 **Gaps and limitations**

26  
27  
28  
29  
30  
31  
32  
33  
34  
35  
36  
37  
38  
39  
40  
41  
42  
43  
44  
45  
46  
47  
48  
49  
50  
51  
52  
53  
54  
55  
56  
57  
58  
59  
60

Several gaps and limitations should be noted in anticipation of the findings of the systematic review and meta-analysis. First, the body composition measurements reported in these studies will always be objective measurements (i.e., BMI, waist circumference and %body composition) which do not precisely measure percentage body fat<sup>52-54</sup>. Second, eating disorder will be assessed through self-reported measurements which might provide biased responses, since underreporting is highly prevalent, especially among girls and overweight/obese

1  
2  
3 1 individuals<sup>45,49,50,55,56</sup>. Any studies that assess disease preventive intervention impacts on self-  
4 reported or anthropometric data may potentially underestimate the effect of the intervention<sup>19</sup>.  
5 2  
6 3 Finally, we are going to cover only adolescents aging from 10 to 19 years old. However, the  
7 4 majority of the integrated interventions focus on these adolescent years<sup>19</sup>.  
8  
9  
10 5

## 6 **Implications**

7 This systematic review and meta-analysis aims to evaluate the impact of obesity and  
8 eating disorder prevention programs for adolescents. Results of this study should provide new  
9 insights into the approaches tested thus far. The systematic review and meta-analysis may also  
10 identify specific gaps in the evidence, which would inform the agenda for future research and  
11 policy.  
12

## 13 **Amendments**

14 If there is a need to amend this protocol, the date, rationale, and a description of each  
15 protocol change will be reported.  
16

## 17 **Ethics and dissemination**

18 Ethics approval will not be required as this is a protocol for systematic review and meta-  
19 analysis. This systematic review and meta-analysis will be published in a peer-reviewed journal  
20 which will be disseminated electronically and in print.  
21

## 22 **Abbreviations**

23 EPHPP: Effective Public Health Project; GRADE: Grading of Recommendations Assessment  
24 Development and Evaluation; HIC: High-income countries; LMIC: Low- middle-income  
25 countries.  
26

## 27 **Contributors**

28 ACBL, the guarantor of the protocol, drafted the protocol and registered it in PROSPERO. TB  
29 reviewed and commented on the protocol in PROSPERO. ACBL, DT, KLLD, TN, STP, TL,  
30 LAVI and TB all reviewed and commented on this protocol.  
31

## 1 Funding

2 This work is a publication of the USDA (USDA/ARS) Children's Nutrition Research Center,  
3 Department of Pediatrics, Baylor College of Medicine (Houston, TX) and has had been funded,  
4 in part, with federal funds from the USDA/ARS under Cooperative Agreement Number 58-  
5 6250-6001. ACBL received a postdoctoral fellowship from the State of São Paulo, Brazil  
6 (FAPESP process nº 2016/ 21144-9).

## 8 Competing interests

9 None declared.

10

## 11 Figure legend

12

13

14

15

16

17

18

19

20

21

22

23

24

25

26

27

28

29

30

31

32

33

34

35

36

37

38

39

40

41

42

43

44

45

46

## 17 References

1. Hoelscher DM, Kirk S, Ritchie L, Cunningham-Sabo L, Academy Positions C. Position of the Academy of Nutrition and Dietetics: interventions for the prevention and treatment of pediatric overweight and obesity. *Journal of the Academy of Nutrition and Dietetics*. 2013;113(10):1375-1394.
2. Ng M, Fleming T, Robinson M, et al. Global, regional, and national prevalence of overweight and obesity in children and adults during 1980–2013: a systematic analysis for the Global Burden of Disease Study 2013. *The Lancet*. 2014;384(9945):766-781.
3. Verstraeten R, Roberfroid D, Lachat C, et al. Effectiveness of preventive school-based obesity interventions in low- and middle-income countries: a systematic review. *The American journal of clinical nutrition*. 2012;96(2):415-438.
4. Moreno LA. Obesity in children and adolescents. A critical review. *Endocrinología y Nutrición*. 2013;60:7-9.
5. Kann L, McManus T, Harris WA, et al. Youth Risk Behavior Surveillance - United States, 2015. *MMWR Surveill Summ*. 2016;65(6):1-174.
6. Reilly JJ, Kelly J. Long-term impact of overweight and obesity in childhood and adolescence on morbidity and premature mortality in adulthood: systematic review. *Int J Obes (Lond)*. 2011;35(7):891-898.
7. Wake M, Canterford L, Patton GC, et al. Comorbidities of overweight/obesity experienced in adolescence: longitudinal study. *Archives of disease in childhood*. 2010;95(3):162-168.



- 1 8. Tsiros MD, Coates AM, Howe PR, Grimshaw PN, Buckley JD. Obesity: the new  
2 childhood disability? *Obesity reviews : an official journal of the International*  
3 *Association for the Study of Obesity*. 2011;12(1):26-36.
- 4 9. Wang Y, Cai L, Wu Y, et al. What childhood obesity prevention programmes work? A  
5 systematic review and meta-analysis. *Obes Rev*. 2015;16(7):547-565.
- 6 10. Boff RM, Liboni RPA, Batista IPA, de Souza LH, Oliveira MDS. Weight loss  
7 interventions for overweight and obese adolescents: a systematic review. *Eating and*  
8 *weight disorders : EWD*. 2017;22(2):211-229.
- 9 11. Silveira JA, Taddei JA, Guerra PH, Nobre MR. The effect of participation in school-  
10 based nutrition education interventions on body mass index: a meta-analysis of  
11 randomized controlled community trials. *Preventive medicine*. 2013;56(3-4):237-  
12 243.
- 13 12. Guerra PH, Nobre MR, da Silveira JA, Taddei JA. School-based physical activity and  
14 nutritional education interventions on body mass index: a meta-analysis of  
15 randomised community trials - project PANE. *Preventive medicine*. 2014;61:81-89.
- 16 13. APA. *Diagnostic and Statistical Manual of Mental Disorders (DSM-5®)*. Arlington, VA:  
17 American Psychiatric Association;2013.
- 18 14. Smink FR, van Hoeken D, Oldehinkel AJ, Hoek HW. Prevalence and severity of DSM-5  
19 eating disorders in a community cohort of adolescents. *Int J Eat Disord*.  
20 2014;47(6):610-619.
- 21 15. Alvarenga Mde F, Scagliusi F, Philippi ST. Development and validity of the  
22 Disordered Eating Attitude Scale (DEAS). *Perceptual and motor skills*.  
23 2010;2010(110):379-395.
- 24 16. Alvarenga Mdos S, Scagliusi FB, Philippi ST. Development and validity of the  
25 Disordered Eating Attitude Scale (DEAS). *Percept Mot Skills*. 2010;110(2):379-395.
- 26 17. Berger U, Sowa M, Bormann B, Brix C, Strauss B. Primary prevention of eating  
27 disorders: characteristics of effective programmes and how to bring them to  
28 broader dissemination. *European eating disorders review : the journal of the Eating*  
29 *Disorders Association*. 2008;16(3):173-183.
- 30 18. Stice E, Shaw H, Marti CN. A meta-analytic review of eating disorder prevention  
31 programs: encouraging findings. *Annu Rev Clin Psychol*. 2007;3:207-231.
- 32 19. Sanchez-Carracedo D, Neumark-Sztainer D, Lopez-Guimera G. Integrated prevention  
33 of obesity and eating disorders: barriers, developments and opportunities. *Public*  
34 *health nutrition*. 2012;15(12):2295-2309.
- 35 20. Le LK, Barendregt JJ, Hay P, Mihalopoulos C. Prevention of eating disorders: A  
36 systematic review and meta-analysis. *Clinical psychology review*. 2017;53:46-58.
- 37 21. Leal GVS, Philippi ST, Polacow VO, Cordas TA, Alvarenga Mdos S. O que é  
38 comportamento de risco para transtornos alimentares em adolescentes? *Jornal*  
39 *Brasileiro de Psiquiatria*. 2013;62 (1):62-75.
- 40 22. Sallis JF, Owen N, Fisher EB. Ecological models of health behavior, in *Health*  
41 *behavior and health education. Theory, research, and practice*. . In: San Francisco,  
42 CA: Jossey-Bass; 2008:465-485.
- 43 23. Balantekin KN, Birch LL, Savage JS. Family, friend, and media factors are associated  
44 with patterns of weight-control behavior among adolescent girls. *Eat Weight Disord*.  
45 2017.

- 1 24. Frederick DA, Sandhu G, Scott T, Akbari Y. Reducing the negative effects of media  
2 exposure on body image: Testing the effectiveness of subvertising and disclaimer  
3 labels. *Body image*. 2016;17:171-174.
- 4 25. Loth K, Wall M, Larson N, Neumark-Sztainer D. Disordered eating and psychological  
5 well-being in overweight and nonoverweight adolescents: secular trends from 1999  
6 to 2010. *The International journal of eating disorders*. 2015;48(3):323-327.
- 7 26. Haines J, Neumark-Sztainer D. Prevention of obesity and eating disorders: a  
8 consideration of shared risk factors. *Health Educ Res*. 2006;21(6):770-782.
- 9 27. Tanofsky-Kraff M, Shomaker LB, Wilfley DE, et al. Targeted prevention of excess  
10 weight gain and eating disorders in high-risk adolescent girls: a randomized  
11 controlled trial. *Am J Clin Nutr*. 2014;100(4):1010-1018.
- 12 28. Sanchez-Carracedo D, Fauquet J, Lopez-Guimera G, et al. The MABIC project: An  
13 effectiveness trial for reducing risk factors for eating disorders. *Behav Res Ther*.  
14 2016;77:23-33.
- 15 29. Irving LM, Neumark-Sztainer D. Integrating the prevention of eating disorders and  
16 obesity: feasible or futile? *Preventive medicine*. 2002;34(3):299-309.
- 17 30. Lopez-Guimera G, Neumark-Sztainer D, Hannan P, Fauquet J, Loth K, Sanchez-  
18 Carracedo D. Unhealthy weight-control behaviours, dieting and weight status: a  
19 cross-cultural comparison between North American and Spanish adolescents. *Eur*  
20 *Eat Disord Rev*. 2013;21(4):276-283.
- 21 31. Moher D, Liberati A, Tetzlaff J, Altman DG, Group P. Preferred reporting items for  
22 systematic reviews and meta-analyses: the PRISMA statement. *PLoS medicine*.  
23 2009;6(7):e1000097.
- 24 32. Watson HJ, Joyce T, French E, et al. Prevention of eating disorders: A systematic  
25 review of randomized, controlled trials. *The International journal of eating disorders*.  
26 2016;49(9):833-862.
- 27 33. Neumark-Sztainer D. Integrating messages from the eating disorders field into  
28 obesity prevention. *Adolesc Med State Art Rev*. 2012;23(3):529-543.
- 29 34. Neumark-Sztainer D. Addressing obesity and other weight-related problems in  
30 youth. *Arch Pediatr Adolesc Med*. 2005;159(3):290-291.
- 31 35. Higgins JP, Altman DG, Gotzsche PC, et al. The Cochrane Collaboration's tool for  
32 assessing risk of bias in randomised trials. *BMJ*. 2011;343:d5928.
- 33 36. Cohen J. A power primer. *Psychol Bull* 1992;112:155-159.
- 34 37. Davey J, Turner RM, Clarke MJ, Higgins PT. Characteristics of meta-analyses and  
35 their component studies in the Cochrane Database of Systematic Reviews: a cross-  
36 sectional, descriptive analysis. *BMC public health*. 2011;11.
- 37 38. Cochran WG. The  $\chi$  test of goodness of t. . *Ann Math Stat* 1952;23:315-345.
- 38 39. Higgins JP, Thompson SG. Quantifying heterogeneity in a meta- analysis. . *Statistics*  
39 *in medicine*. 2002;21:1539-1558.
- 40 40. Huedo-Medina TB, Sánchez-Meca J, Marín-Martínez F, J. B. Assessing heterogeneity  
41 in meta-analysis: Q statistic or I2 index? *Psychol Methods* 2006;11:193-206.
- 42 41. Higgins JP, Thompson SG, Spiegelhalter DJ. A re-evaluation of random-effects meta-  
43 analysis. . *J R Stat Soc Ser A Stat Soc*. 2009;172:137-159.
- 44 42. Sutton AJ, Duval SJ, Tweedie RL, Abrams KR, Jones DR. Empirical assessment of  
45 effect of publication bias on meta-analyses. *BMJ*. 2000;320(1574-7).



- 1  
2  
3 1 43. Duval S, Tweedie R. A nonparametric “trim and fill” method of accounting for  
4 2 publication bias in meta-analysis. . *J Am Stat Assoc.* 2000;95:89–98.  
5 3 44. Egger. M., Davey Smith G, Schneider M, , Minder C. Bias in meta-analysis detected  
6 4 by a simple, graphical test. . *BMJ* 1997;315:629–634.  
7 5 45. Loth K, Wall M, Larson N, Neumark-Sztainer D. Disordered eating and psychological  
8 6 well-being in overweight and nonoverweight adolescents: Secular trends from 1999  
9 7 to 2010. *The International journal of eating disorders.* 2015.  
10 8 46. Suisman JL, Thompson JK, Keel PK, et al. Genetic and environmental influences on  
11 9 thin-ideal internalization across puberty and preadolescent, adolescent, and young  
12 10 adult development. *The International journal of eating disorders.* 2014;47(7):773-  
13 11 783.  
14 12 47. Stamatakis E, Wardle J, Cole TJ. Childhood obesity and overweight prevalence trends  
15 13 in England: evidence for growing socioeconomic disparities. *Int J Obes (Lond).*  
16 14 2010;34(1):41-47.  
17 15 48. Jaacks LM, Slining MM, Popkin BM. Recent trends in the prevalence of under- and  
18 16 overweight among adolescent girls in low- and middle-income countries. *Pediatric*  
19 17 *obesity.* 2015.  
20 18 49. Spencer RA, Rehman L, Kirk SF. Understanding gender norms, nutrition, and  
21 19 physical activity in adolescent girls: a scoping review. *The international journal of*  
22 20 *behavioral nutrition and physical activity.* 2015;12:6.  
23 21 50. Goldschmidt AB, Wall MM, Loth KA, Neumark-Sztainer D. Risk Factors for  
24 22 Disordered Eating in Overweight Adolescents and Young Adults. *Journal of pediatric*  
25 23 *psychology.* 2015;40(10):1048-1055.  
26 24 51. Atkins D, Best D, Briss PA, et al. Grading quality of evidence and strength of  
27 25 recommendations. . *BMJ* 2004;328:1490–1494.  
28 26 52. Bogart LM, Elliott MN, Cowgill BO, et al. Two-Year BMI Outcomes From a School-  
29 27 Based Intervention for Nutrition and Exercise: A Randomized Trial. *Pediatrics.*  
30 28 2016;137(5).  
31 29 53. Sharif Ishak SI, Chin YS, Mohd Taib MN, Mohd Shariff Z. School-based intervention to  
32 30 prevent overweight and disordered eating in secondary school Malaysian  
33 31 adolescents: a study protocol. *BMC public health.* 2016;16(1):1101.  
34 32 54. Pbert L, Druker S, Barton B, et al. A School-Based Program for Overweight and  
35 33 Obese Adolescents: A Randomized Controlled Trial. *J Sch Health.* 2016;86(10):699-  
36 34 708.  
37 35 55. Dunstan CJ, Paxton SJ, McLean SA. An evaluation of a body image intervention in  
38 36 adolescent girls delivered in single-sex versus co-educational classroom settings.  
39 37 *Eating behaviors.* 2016.  
40 38 56. Datar A, Chung PJ. Accuracy of Weight Perceptions in a Nationally Representative  
41 39 Cohort of US 8th Grade Adolescents. *Academic pediatrics.* 2015.  
42 40  
43 41  
44  
45  
46  
47  
48  
49  
50  
51  
52  
53  
54  
55  
56  
57  
58  
59  
60

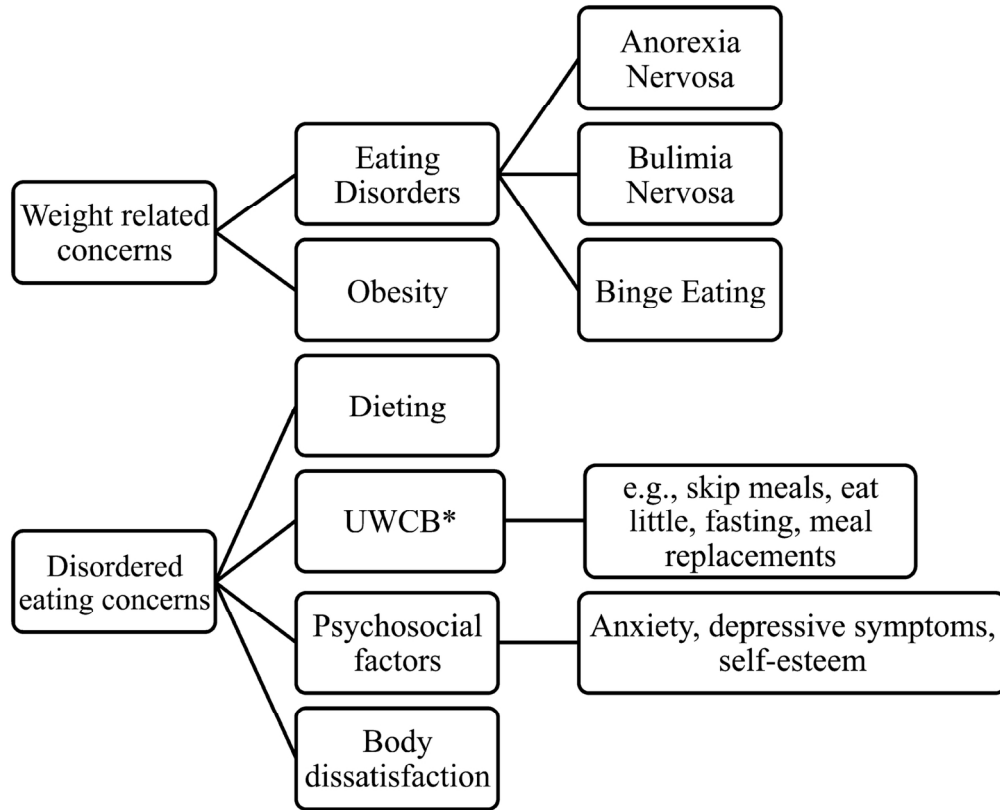

Figure 1 - Scheme of the weight-related behaviors

73x59mm (600 x 600 DPI)

### Supplement figure 1 – Search strategy in MedLine

|                                              |           |
|----------------------------------------------|-----------|
| exp "Feeding and eating disorders"/          | 27,825    |
| (bing* and (food or eat*)).ti.               | 1,963     |
| (bing* and (food or eat*)).ab.               | 5,375     |
| (bing* and (food or eat*)).kw.               | 199       |
| (disorder* and (food or eat*)).ti.           | 9,465     |
| (disorder* and (food or eat*)).ab.           | 28,521    |
| (disorder* and (food or eat*)).kw.           | 72        |
| (anorexia or anorexic).ti,ab,kw.             | 28,138    |
| bulimi* or bulemi*).ti,ab,kw.                | 7,825     |
| 1 or 2 or 3 or 4 or 5 or 6 or 7 or 8 or 9    | 63,512    |
| exp Obesity/                                 | 183,262   |
| exp Overweight/                              | 188,264   |
| exp Body Weight/                             | 422,550   |
| obes*.ti,ab,kw.                              | 247,930   |
| (overweight or "over weight").ti,ab,kw.      | 55,791    |
| 11 or 12 or 13 or 14 or 15                   | 528,049   |
| exp Primary Prevention/                      | 138,711   |
| "prevention & control".fs.                   | 1,201,380 |
| exp Health Promotion/                        | 68,683    |
| exp Health Education/                        | 156,404   |
| exp School Health Services/                  | 22,370    |
| prevent*.ti,ab,kw.                           | 1,207,081 |
| educat*.ti,ab,kw.                            | 497,253   |
| promot*.ti,ab,kw.                            | 812,498   |
| 17 or 18 or 19 or 20 or 21 or 22 or 23 or 24 | 3,303,119 |
| exp Adolescent/                              | 1,884,302 |
| (adolescen* or teen* or youth*).ti,ab,kw.    | 296,306   |
| 26 or 27                                     | 1,955,018 |
| 10 and 6 and 25 and 28                       | 982       |

**PRISMA-P (Preferred Reporting Items for Systematic review and Meta-Analysis Protocols) 2015 checklist: recommended items to address in a systematic review protocol\***

| Section and topic                 | Item No | Checklist item                                                                                                                                                                                                                | Page                           |
|-----------------------------------|---------|-------------------------------------------------------------------------------------------------------------------------------------------------------------------------------------------------------------------------------|--------------------------------|
| <b>ADMINISTRATIVE INFORMATION</b> |         |                                                                                                                                                                                                                               |                                |
| Title:                            |         |                                                                                                                                                                                                                               |                                |
| Identification                    | 1a      | Identify the report as a protocol of a systematic review                                                                                                                                                                      | 1                              |
| Update                            | 1b      | If the protocol is for an update of a previous systematic review, identify as such                                                                                                                                            | N/A                            |
| Registration                      | 2       | If registered, provide the name of the registry (such as PROSPERO) and registration number                                                                                                                                    | PROSPERO <b>CRD42017076547</b> |
| Authors:                          |         |                                                                                                                                                                                                                               |                                |
| Contact                           | 3a      | Provide name, institutional affiliation, e-mail address of all protocol authors; provide physical mailing address of corresponding author                                                                                     | 1                              |
| Contributions                     | 3b      | Describe contributions of protocol authors and identify the guarantor of the review                                                                                                                                           | 10                             |
| Amendments                        | 4       | If the protocol represents an amendment of a previously completed or published protocol, identify as such and list changes; otherwise, state plan for documenting important protocol amendments                               | N/A                            |
| Support:                          |         |                                                                                                                                                                                                                               |                                |
| Sources                           | 5a      | Indicate sources of financial or other support for the review                                                                                                                                                                 | 10-11                          |
| Sponsor                           | 5b      | Provide name for the review funder and/or sponsor                                                                                                                                                                             | 10-11                          |
| Role of sponsor or funder         | 5c      | Describe roles of funder(s), sponsor(s), and/or institution(s), if any, in developing the protocol                                                                                                                            | 10-11                          |
| <b>INTRODUCTION</b>               |         |                                                                                                                                                                                                                               |                                |
| Rationale                         | 6       | Describe the rationale for the review in the context of what is already known                                                                                                                                                 | 2-6                            |
| Objectives                        | 7       | Provide an explicit statement of the question(s) the review will address with reference to participants, interventions, comparators, and outcomes (PICO)                                                                      | 6                              |
| <b>METHODS</b>                    |         |                                                                                                                                                                                                                               |                                |
| Eligibility criteria              | 8       | Specify the study characteristics (such as PICO, study design, setting, time frame) and report characteristics (such as years considered, language, publication status) to be used as criteria for eligibility for the review | 6-7                            |
| Information sources               | 9       | Describe all intended information sources (such as electronic databases, contact with study authors, trial registers or other grey literature sources) with planned dates of coverage                                         | 7                              |
| Search strategy                   | 10      | Present draft of search strategy to be used for at least one electronic database, including planned limits,                                                                                                                   | 7                              |

|                                    |     |                                                                                                                                                                                                                                                  |     |
|------------------------------------|-----|--------------------------------------------------------------------------------------------------------------------------------------------------------------------------------------------------------------------------------------------------|-----|
|                                    |     | such that it could be repeated                                                                                                                                                                                                                   |     |
| Study records:                     |     |                                                                                                                                                                                                                                                  |     |
| Data management                    | 11a | Describe the mechanism(s) that will be used to manage records and data throughout the review                                                                                                                                                     | 7-8 |
| Selection process                  | 11b | State the process that will be used for selecting studies (such as two independent reviewers) through each phase of the review (that is, screening, eligibility and inclusion in meta-analysis)                                                  | 7-8 |
| Data collection process            | 11c | Describe planned method of extracting data from reports (such as piloting forms, done independently, in duplicate), any processes for obtaining and confirming data from investigators                                                           | 7-8 |
| Data items                         | 12  | List and define all variables for which data will be sought (such as PICO items, funding sources), any pre-planned data assumptions and simplifications                                                                                          | 6   |
| Outcomes and prioritization        | 13  | List and define all outcomes for which data will be sought, including prioritization of main and additional outcomes, with rationale                                                                                                             | 6   |
| Risk of bias in individual studies | 14  | Describe anticipated methods for assessing risk of bias of individual studies, including whether this will be done at the outcome or study level, or both; state how this information will be used in data synthesis                             | 8   |
| Data synthesis                     | 15a | Describe criteria under which study data will be quantitatively synthesised                                                                                                                                                                      | 8   |
|                                    | 15b | If data are appropriate for quantitative synthesis, describe planned summary measures, methods of handling data and methods of combining data from studies, including any planned exploration of consistency (such as $I^2$ , Kendall's $\tau$ ) | 8-9 |
|                                    | 15c | Describe any proposed additional analyses (such as sensitivity or subgroup analyses, meta-regression)                                                                                                                                            | 8-9 |
|                                    | 15d | If quantitative synthesis is not appropriate, describe the type of summary planned                                                                                                                                                               | N/A |
| Meta-bias(es)                      | 16  | Specify any planned assessment of meta-bias(es) (such as publication bias across studies, selective reporting within studies)                                                                                                                    | N/A |
| Confidence in cumulative evidence  | 17  | Describe how the strength of the body of evidence will be assessed (such as GRADE)                                                                                                                                                               | 9   |

**\* It is strongly recommended that this checklist be read in conjunction with the PRISMA-P Explanation and Elaboration (cite when available) for important clarification on the items. Amendments to a review protocol should be tracked and dated. The copyright for PRISMA-P (including checklist) is held by the PRISMA-P Group and is distributed under a Creative Commons Attribution Licence 4.0.**

*From: Shamseer L, Moher D, Clarke M, Ghersi D, Liberati A, Petticrew M, Shekelle P, Stewart L, PRISMA-P Group. Preferred reporting items for systematic review and meta-analysis protocols (PRISMA-P) 2015: elaboration and explanation. BMJ. 2015 Jan 2;349(jan02 1):g7647.*
