# Supplementary material for: Obesity and eating disorders in integrative prevention programmes for adolescents: protocol for a systematic review and meta-analysis
Source: PubMed Central journal article supplement (PMC5914714; doi:10.1136/bmjopen-2017-020381), 2018-04-19
Supplement: bmjopen-2017-020381supp001.pdf [file bmjopen-2017-020381supp001.pdf]

## Supplement figure 1 – Search strategy in MedLine

|                                              |           |
|----------------------------------------------|-----------|
| exp "Feeding and eating disorders"/          | 27,825    |
| (bing* and (food or eat*)).ti.               | 1,963     |
| (bing* and (food or eat*)).ab.               | 5,375     |
| (bing* and (food or eat*)).kw.               | 199       |
| (disorder* and (food or eat*)).ti.           | 9,465     |
| (disorder* and (food or eat*)).ab.           | 28,521    |
| (disorder* and (food or eat*)).kw.           | 72        |
| (anorexia or anorexic).ti,ab,kw.             | 28,138    |
| bulimi* or bulemi*).ti,ab,kw.                | 7,825     |
| 1 or 2 or 3 or 4 or 5 or 6 or 7 or 8 or 9    | 63,512    |
| exp Obesity/                                 | 183,262   |
| exp Overweight/                              | 188,264   |
| exp Body Weight/                             | 422,550   |
| obes*.ti,ab,kw.                              | 247,930   |
| (overweight or "over weight").ti,ab,kw.      | 55,791    |
| 11 or 12 or 13 or 14 or 15                   | 528,049   |
| exp Primary Prevention/                      | 138,711   |
| "prevention & control".fs.                   | 1,201,380 |
| exp Health Promotion/                        | 68,683    |
| exp Health Education/                        | 156,404   |
| exp School Health Services/                  | 22,370    |
| prevent*.ti,ab,kw.                           | 1,207,081 |
| educat*.ti,ab,kw.                            | 497,253   |
| promot*.ti,ab,kw.                            | 812,498   |
| 17 or 18 or 19 or 20 or 21 or 22 or 23 or 24 | 3,303,119 |
| exp Adolescent/                              | 1,884,302 |
| (adolescen* or teen* or youth*).ti,ab,kw.    | 296,306   |
| 26 or 27                                     | 1,955,018 |
| 10 and 6 and 25 and 28                       | 982       |
